# Supplementary material for: Serum metabolomics analysis reveals metabolite profile and key biomarkers of idiopathic membranous nephropathy
Source: PeerJ journal article supplement (doi:10.7717/peerj.15167), 2023-04-06
Supplement: Graphical_abstract.pdf [file Graphical_abstract.pdf]

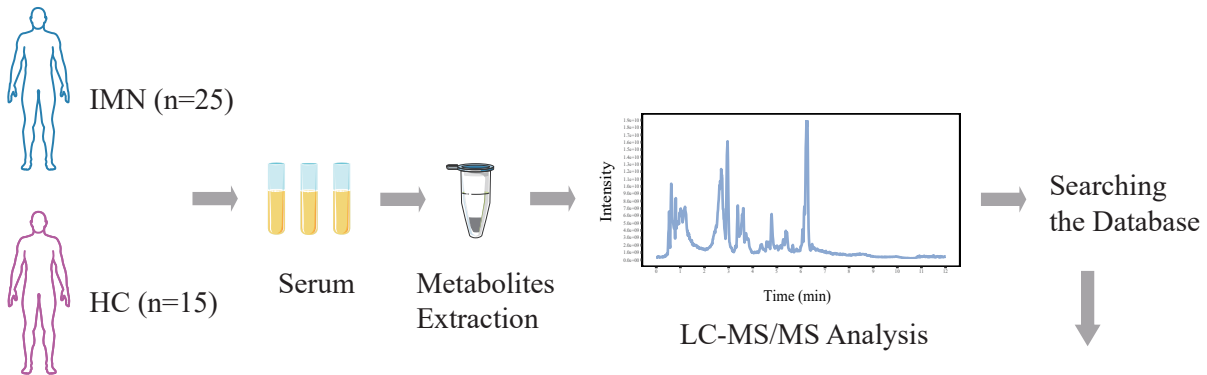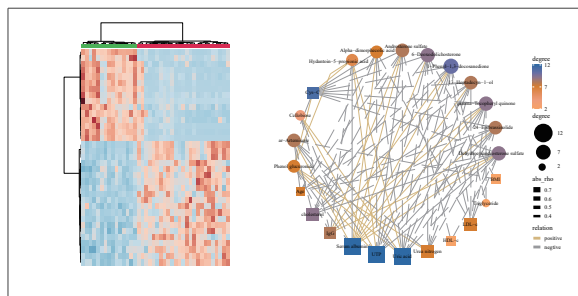

Bioinformatics Analysis
