# Supplementary material for: Serum metabolomics analysis reveals metabolite profile and key biomarkers of idiopathic membranous nephropathy
Source: PeerJ. 2023 Apr 6;11:e15167. doi: 10.7717/peerj.15167 (PMC10083006; doi:10.7717/peerj.15167)
Supplement: Supplemental Information 2 — Clinical characteristics [file peerj-11-15167-s002.xlsx]

## Sheet: Sheet1
index	MN10	MN11	MN12	MN13	MN14	MN15	MN16	MN17	MN18	MN19	MN2	MN20	MN21	MN24	MN22	MN25	MN26	MN27	MN3	MN4	MN5	MN6	MN7	MN8	MN9	HC1	HC2	HC3	HC4	HC5	HC6	HC7	HC8	HC9	HC10	HC11	HC12	HC13	HC14	HC15
Gender (male/female)	female	female	male	female	female	male	male	male	female	male	female	male	male	female	male	female	male	female	female	male	female	male	female	male	female	female	female	female	female	male	female	female	male	male	female	female	male	female	female	female
Age(years)	40	49	73	67	72	69	44	61	56	50	71	69	52	57	61	70	45	61	46	57	67	53	49	59	69	47	52	67	45	46	60	60	46	55	43	53	64	59	57	55
BMI(kg/m2 )	23.9	19.15	20.16	22.06	28.55	23.44	24.61	22.81	22.1	30.8	22.19	24.22	23.03	23.96	25.09	20.34	27.99	20.81	28.8	25.16	21.56	24.82	21.7	20.69	23	23	20.2	22.5	20.1	21.6	22.1	24.8	21.3	23.7	18.9	20.3	23.3	24.5	21	19.8
Systolic pressure(mmHg)	115	110	110	133	142	131	160	112	147	122	145	125	100	116	132	115	127	127	123	120	111	127	131	137	107	123	130	108	109	124	121	111	112	126	118	103	128	105	115	110
UTP（g/24h）	6.925	2.457	0.4608	0.57	1.17	1.7404	4.4415	2.4605	3.3985	11.646	0.1397	9.1245	1.242	3.325	5.964	2.097	5.2182	3.606	2.76	2.8179	2.0925	3.8604	0.1743	0.8404	0.0828	0	0	0	0	0	0	0	0	0	0	0	0	0	0	0
ALT(U/L)	17	17	22	34	21	25	33	8	17	57	26	3	58	41	20	7	21	28	12	14	20	6	8	15	20	13	11	22	20	12	9	22	21	17	9	8	13	15	20	10
AST(U/L)	11	20	24	26	13	29	21	20	14	28	26	13	22	24	22	20	13	49	18	17	9	16	14	13	16	18	16	21	23	17	19	21	26	23	11	9	15	19	21	14
Serum albumin(g/L)	18.4	25	34.8	34.2	30.7	33.4	25.4	15.4	29.1	19.8	39	20.4	29.7	32.6	24.9	37.4	30.1	20.8	36.8	18.4	27.1	16.5	34	29.2	35.5	45.2	41.2	40.6	41.1	42.6	43.7	35.3	43.2	42.4	39.8	42.8	36.8	40.2	38.2	40.1
FBG (mmol/l)	4.56	4.5	3.67	5.2	5.1	4.59	4.38	4.63	3.94	5.67	8.83	6.93	4.91	5.97	4.54	4.29	6.75	5.13	4.38	5.69	8.46	5.04	4.13	4.48	6.07	5.01	5.89	4.93	5.52	5.63	4.97	6	5.84	5.69	5.53	5.92	4.87	5.31	6.01	5.28
Urea nitrogen(mmol/l)	10.26	10.95	5.42	4.13	4.21	9.38	9.29	4.42	5.77	8.48	3.57	2.68	7.03	14.43	8.56	5.45	4.41	6.5	5.77	8.06	8.07	13.2	5.04	7.27	12.61	4.87	4.58	4.56	4.12	3.61	4.46	5.12	4.38	4.32	4.12	4.35	4.76	5.18	4.71	4.91
Creatinine(umol/l)	69.8	56.5	64	122	59	121.6	119	96.7	57.7	85	50.3	56.6	87.5	83.7	97.6	77	60	64.2	66	91.6	43	125.7	54	68.7	146.8	54	69.4	63.5	53.2	72	69	69.1	67	71	77.3	86	79	67.2	72	60
Uric acid(umol/l)	471.4	377.3	319	437	518	390	406.5	349.3	381.8	475	322.4	218	416.7	306.8	514	299	431	489.3	356	559.2	437	288.7	333.5	523.6	749.5	312	221	298	304	298	297	313	281	307	286	243	267	253	352	276
cholesterol(mmol/l)	6.79	8.47	5.8	4.33	5.45	5.64	6.57	9.68	6.32	7.36	5.72	6.56	3.9	3.87	4.93	5.07	7.89	11.91	5.8	7.34	4.17	9.22	6.27	4.68	11.41	4.1	4.13	4.51	3.88	3.32	3.91	5.12	4.75	4.12	4.37	4.19	4.86	4.7	4.33	4.8
Triglyceride(mmol/l)	2.47	2.03	1.51	0.67	1.9	3.1	1.4	2.02	2.47	2.85	1.4	1.34	1.19	3.66	1.35	1.68	6.9	0.97	1.78	2.87	2.16	1.07	1.67	1.56	5.85	1.65	1.41	1.69	1.55	1.45	1.58	1.42	1.49	1.48	0.92	1.62	1.37	1.8	1.79	1.46
HDL-c (mmol/l)	1.18	1.5	1.5	1.38	1.33	1.2	0.84	1.51	1.46	1.23	1.8	1.13	1.47	1.03	1.45	1.02	1.47	2.61	1.2	1.18	1.05	2.14	1.45	1.43	1.7	1.16	1.21	1.12	1.24	1.23	1.28	1.12	1.33	1.32	1.21	1.19	1.24	1.39	1.2	1.1
LDL-c (mmol/l)	4.21	5.56	2.97	1.78	2.41	3.41	4.56	6.01	3.73	4.48	3.73	4.31	1.9	2.08	2.73	2.77	3.41	7.57	2.73	4.55	2.42	5.75	3.83	2.6	6.44	2.5	2.52	2.67	2.56	2.63	2.53	3.01	2.39	2.47	2.63	2.52	2.55	2.6	2.49	2.44
Cys-C (mg/L)	1.12	1.41	1.3	2.57	1.26	1.52	1.76	0.87	1.28	1.22	1.3	1.18	1.12	1.48	1.47	1.16	1.15	1.13	1.51	1.34	1.21	2.49	0.78	1.13	3.19	0.98	0.86	1.08	1.12	0.97	1.03	0.79	1	0.78	1.1	0.96	0.75	1.12	0.83	0.72
lgG (g/L)	8	3.15	7.9	8.01	9.87	11.44	5.57	6.68	3.51	3.1	7.9	13.76	4.41	9.91	8.18	8.21	6.88	7.89	6.54	6.27	8.69	3.5	5.31	7.8	6.78	9.08	8.01	8.21	11.3	12.5	8.12	9.13	10.2	8.76	10.67	11.9	9.8	8.2	10.1	9.17
