# Supplementary material for: Serum metabolomics analysis reveals metabolite profile and key biomarkers of idiopathic membranous nephropathy
Source: PeerJ. 2023 Apr 6;11:e15167. doi: 10.7717/peerj.15167 (PMC10083006; doi:10.7717/peerj.15167)
Supplement: Supplemental Information 3 [file peerj-11-15167-s003.xlsx]

## Sheet: Sheet1
MS2 name	MS2 score	rt	mz	SuperClass	MEAN A	MEAN N	VIP	P-VALUE	Q-VALUE	FOLD CHANGE	LOG_FOLDCHANGE
Oleic acid	0.999981	38.6953	281.249	Lipids and lipid-like molecules	0.00521933	0.00822919	1.19822	0.0189447	0.0565444	0.634245	-0.656887
Palmitoleic acid	0.999888	43.5055	253.218	Lipids and lipid-like molecules	0.000657696	0.00118493	1.2186	0.0171406	0.052632	0.555049	-0.849313
Quinoline	0.999816	44.9083	130.065	Organoheterocyclic compounds	5.71033e-05	9.12638e-05	2.06944	4.44588e-05	0.000524485	0.625695	-0.676469
Indoleacetaldehyde	0.999311	33.195	158.06	Organoheterocyclic compounds	0.000482834	0.00064226	1.50932	0.0120557	0.0409341	0.751773	-0.41163
Arachidonic acid	0.999252	36.9012	303.233	Lipids and lipid-like molecules	0.000325356	0.000550874	1.71113	0.00120542	0.00751166	0.590618	-0.759703
Uracil	0.999203	169.397	113.035	Organoheterocyclic compounds	3.39557e-05	7.47324e-05	1.20838	0.00335894	0.0162626	0.454364	-1.13808
Hypoxanthine	0.999116	175.768	137.046	Organoheterocyclic compounds	0.00678798	0.00409145	1.2706	0.000221272	0.00202086	1.65907	0.730371
Thiiraneacetonitrile	0.999066	244.023	100.022	Organoheterocyclic compounds	1.21913e-05	2.82317e-05	1.63326	7.63741e-08	2.69557e-06	0.431831	-1.21146
1-Methylnicotinamide	0.998535	318.214	137.071	Organoheterocyclic compounds	4.10335e-05	0.000106552	2.08314	0.0165207	0.0512661	0.385101	-1.37669
N6-Methyladenosine	0.998494	302.185	282.119	Nucleosides, nucleotides, and analogues	5.17901e-05	4.31701e-05	1.16996	0.00147541	0.00874408	1.19968	0.262645
Dehydroepiandrosterone sulfate	0.998098	27.0159	367.159	Lipids and lipid-like molecules	0.000435851	0.00666244	2.65736	8.5568e-10	7.70383e-08	0.0654191	-3.93414
Guanine	0.997623	278.473	152.057	Organoheterocyclic compounds	8.1836e-06	1.85678e-05	1.34766	0.0141332	0.0458989	0.440742	-1.18199
9-Decenoic acid	0.997548	50.5944	169.123	Lipids and lipid-like molecules	7.00822e-05	0.00023562	2.40035	2.74693e-05	0.000347041	0.297438	-1.74934
Uridine	0.995161	169.405	245.077	Nucleosides, nucleotides, and analogues	6.37053e-06	1.34428e-05	1.51957	0.00435515	0.0196823	0.473899	-1.07735
Ketoleucine	0.995099	37.3999	129.055	Organic acids and derivatives	0.00549691	0.00845931	1.96335	1.50468e-05	0.000208958	0.649805	-0.62192
12-HETE	0.99363	48.8367	319.228	Lipids and lipid-like molecules	5.99695e-06	2.21251e-05	2.0098	0.0350785	0.0870159	0.271047	-1.88338
Undecylenic acid	0.993398	49.1878	183.139	Lipids and lipid-like molecules	2.67452e-05	6.30902e-05	1.90979	6.92153e-06	0.000109526	0.423919	-1.23814
Caprylic acid	0.992554	47.9567	143.107	Lipids and lipid-like molecules	0.000113723	0.000149175	1.49921	0.0362387	0.0889063	0.762346	-0.391481
N-Ethylglycine	0.992085	314.63	104.071	Organic acids and derivatives	0.000247157	0.000172517	1.8143	0.000117054	0.00120378	1.43266	0.518691
Cellobiose	0.990262	411.642	365.106	Organic oxygen compounds	1.84632e-06	1.54282e-07	1.78198	0.0276078	0.0737998	11.9672	3.58101
9,10-epoxyoctadecanoic acid	0.988528	49.4928	297.243	Lipids and lipid-like molecules	2.76607e-05	4.41039e-05	1.48055	0.00573323	0.0239809	0.627171	-0.673069
3-Methylhistidine	0.987819	393.078	170.093	Organic acids and derivatives	0.000142848	4.8401e-05	1.16197	0.00529655	0.0226803	2.95134	1.56137
Dodecanoic acid	0.987462	46.2632	199.17	Lipids and lipid-like molecules	9.23782e-05	0.000272484	2.27438	0.00141924	0.00848336	0.339022	-1.56055
Propionylcarnitine	0.98688	297.55	218.139	Lipids and lipid-like molecules	0.000644131	0.000341542	1.46128	0.00304181	0.0151505	1.88595	0.915291
Homocitrulline	0.984126	395.788	190.119	Organic acids and derivatives	3.76468e-06	7.79522e-07	2.27367	8.93168e-05	0.00095778	4.82948	2.27187
16-Hydroxy hexadecanoic acid	0.98323	49.5422	271.228	Lipids and lipid-like molecules	4.18543e-05	8.51564e-05	2.46171	2.47069e-06	4.74202e-05	0.491499	-1.02474
4-Dodecylbenzenesulfonic Acid	0.982494	26.1587	325.184	Benzenoids	0.000987411	0.00165034	1.53582	0.00507	0.021981	0.598309	-0.741038
Valyl-Proline	0.982105	333.615	215.139	Organic acids and derivatives	5.48947e-06	2.36485e-06	1.37033	0.0491742	0.108708	2.32127	1.21492
(10E,12Z)-(9S)-9-Hydroperoxyoctadeca-10,12-dienoic acid	0.979383	199.215	311.223	Lipids and lipid-like molecules	4.66905e-06	1.10613e-05	2.20676	0.000302705	0.0026108	0.422107	-1.24432
Niacinamide	0.979155	57.2054	123.056	Organoheterocyclic compounds	1.48685e-05	2.87103e-05	2.01258	0.00164112	0.00949274	0.51788	-0.94931
N-Ornithyl-L-taurine	0.978133	233.714	240.102	Organic acids and derivatives	3.47059e-06	1.14331e-05	1.68147	0.000328452	0.00278405	0.303557	-1.71996
Maslinic acid	0.977619	92.3181	471.348	Lipids and lipid-like molecules	9.66274e-07	2.95777e-06	2.06257	0.00113968	0.00719992	0.32669	-1.61401
(Â±)-Tryptophan	0.977021	278.477	205.097	Organoheterocyclic compounds	0.000257145	0.000320188	1.30581	0.0305866	0.0792903	0.803106	-0.316337
Isoleucyl-Leucine	0.977016	202.806	245.186	Organic acids and derivatives	1.11979e-05	2.30162e-05	1.63907	0.000833679	0.00570445	0.486523	-1.03942
4-Coumaroyl-2-hydroxyputrescine	0.976154	383.717	251.137	Phenylpropanoids and polyketides	1.12247e-06	5.70423e-07	1.3466	0.00296714	0.0148809	1.96778	0.976569
Guanidoacetic acid	0.973804	367.964	118.062	Organic acids and derivatives	1.96418e-05	3.10366e-05	1.90466	9.18181e-05	0.000980233	0.632861	-0.660039
LysoPE(16:0/0:0)	0.970468	222.313	454.292	Lipids and lipid-like molecules	0.00018647	0.000107876	1.90198	5.71092e-05	0.000652673	1.72855	0.789559
Trans-urocanate	0.966986	302.069	139.05	Organic compounds	2.90299e-05	4.8269e-05	1.66047	0.0013139	0.00801127	0.601419	-0.733558
4-Guanidinobutanoic acid	0.965174	383.941	146.093	Organic acids and derivatives	0.000119672	8.65145e-05	1.27968	0.0087725	0.0327001	1.38326	0.468068
gamma-CEHC	0.964781	79.5901	263.129	Organoheterocyclic compounds	2.25484e-06	4.64335e-06	1.95255	0.00977538	0.0352513	0.485606	-1.04214
L-Glutamic acid	0.962084	409.326	148.061	Organic acids and derivatives	1.83797e-05	1.19879e-05	1.38799	0.00579495	0.0241598	1.53319	0.616536
Alanyl-Leucine	0.960277	249.517	203.139	Organic acids and derivatives	9.49134e-06	1.63767e-05	1.59889	0.00100161	0.00654189	0.579563	-0.786963
Uric acid	0.960136	342.021	167.02	Organoheterocyclic compounds	5.55986e-06	7.7275e-06	1.35641	0.0180544	0.0546414	0.71949	-0.474954
Phenoxyacetic acid	0.959552	141.8	151.039	Benzenoids	3.21625e-05	0.000135693	2.10675	0.0159072	0.0499237	0.237024	-2.07689
Allocholic acid	0.959244	238.028	407.281	Lipids and lipid-like molecules	2.34264e-05	1.58665e-06	1.14633	0.00562607	0.0236673	14.7647	3.88408
Itaconic acid	0.958069	447.312	129.018	Lipids and lipid-like molecules	7.66456e-06	4.85035e-06	1.64457	0.000843428	0.00575347	1.58021	0.660114
Deoxycholic acid	0.957909	59.3856	391.286	Lipids and lipid-like molecules	4.38725e-06	2.28265e-05	2.53318	1.35602e-08	7.08413e-07	0.1922	-2.37932
Furcelleran	0.956309	254.808	478.198	Phenylpropanoids and polyketides	9.99211e-06	1.75392e-05	1.37719	0.0113903	0.0392785	0.569702	-0.811722
L-Arginine	0.952679	531.616	175.119	Organic acids and derivatives	0.000446451	0.000349226	1.33844	0.0188454	0.0563348	1.2784	0.354339
2-Hydroxyethanesulfonate	0.952517	157.674	124.99	Organic acids and derivatives	0.000710651	0.000466257	1.02263	0.0167137	0.0516822	1.52416	0.608014
Hydantoin-5-propionic acid	0.951475	310.792	171.04	Organoheterocyclic compounds	2.21634e-06	8.01856e-09	2.12073	0.00080911	0.00557956	276.401	8.11062
ar-Artemisene	0.942521	191.992	271.242	Lipids and lipid-like molecules	3.39681e-07	7.38462e-06	2.42593	0.0298392	0.077944	0.0459985	-4.44227
D-2,3-Dihydroxypropanoic acid	0.942063	311.175	105.018	Organic oxygen compounds	4.2818e-05	3.60882e-05	1.46755	0.00411763	0.0188868	1.18648	0.246691
Pseudouridine	0.9418	255.26	243.062	Nucleosides, nucleotides, and analogues	7.2957e-05	4.42598e-05	1.77864	0.000740897	0.00522277	1.64838	0.721049
Alpha-dimorphecolic acid	0.940604	84.4378	279.232	Lipids and lipid-like molecules	5.89159e-06	6.99542e-05	2.56066	0.000525693	0.00400778	0.0842206	-3.56968
Dimethylethanolamine	0.940374	38.533	90.0919	Organonitrogen compounds	3.74911e-05	3.08476e-05	1.49018	0.0115411	0.0396584	1.21537	0.281391
3-Aminoisobutanoic acid	0.940188	352.147	102.055	Organic acids and derivatives	1.52456e-05	1.19187e-05	1.15939	0.0388678	0.0930462	1.27913	0.355158
Inosine	0.936107	229.058	267.073	Nucleosides, nucleotides, and analogues	0.000146643	8.61143e-05	1.20397	0.0384761	0.0924368	1.70289	0.767983
LysoPE(18:1(9Z)/0:0)	0.935738	219.596	480.308	Lipids and lipid-like molecules	9.32796e-05	5.38093e-05	1.10275	0.000950953	0.00629512	1.73352	0.793706
Sucrose	0.931784	378.909	341.109	Organic oxygen compounds	3.4525e-06	1.4013e-07	1.04402	0.0389144	0.0931185	24.6378	4.6228
3-Dehydrocarnitine	0.929974	384.743	160.108	Organic acids and derivatives	1.27079e-05	1.86773e-05	1.53495	0.0120331	0.0408788	0.680394	-0.555558
Phenol glucuronide	0.92502	333.849	293.063	Organic oxygen compounds	1.53229e-06	1.52285e-07	1.79163	0.0483572	0.107482	10.062	3.33084
2-Acetyl-3-ethylidene-3,4,5,6-tetrahydropyridine	0.923065	50.1471	152.107	Organoheterocyclic compounds	1.79388e-05	3.10291e-05	1.80526	0.00135038	0.00817475	0.578126	-0.790544
Piperine	0.92233	32.6775	286.143	Alkaloids and derivatives	4.01444e-05	0.000204742	1.99831	0.0381345	0.0919073	0.196073	-2.35054
Norophthalmic acid	0.915216	441.57	276.119	Organic acids and derivatives	1.80051e-06	1.39987e-06	1.43564	0.00539786	0.0229876	1.2862	0.363116
Esculentic acid (Diplazium)	0.906602	91.9661	487.342	Lipids and lipid-like molecules	5.97642e-07	3.52334e-06	2.29467	1.60429e-05	0.000220393	0.169624	-2.55959
3-Methylglutarylcarnitine	0.906376	401.411	290.16	Lipids and lipid-like molecules	3.06542e-05	4.76714e-06	1.57039	0.0176173	0.0536875	6.43031	2.68489
Homoarecoline	0.906286	55.4213	170.118	Alkaloids and derivatives	4.18952e-05	9.08859e-05	1.832	9.60225e-06	0.000143905	0.460965	-1.11727
1,3-Dimethyluracil	0.902189	318.312	141.066	Organoheterocyclic compounds	0.000239664	5.29045e-05	1.2761	0.0327687	0.0831245	4.53013	2.17955
Asymmetric dimethylarginine	0.901895	510.879	203.15	Organic acids and derivatives	2.35356e-05	1.36633e-05	1.9023	7.28767e-06	0.000114288	1.72255	0.784545
Imidazoleacetic acid	0.901729	69.4313	125.035	Organoheterocyclic compounds	1.61527e-05	1.16608e-05	1.75338	5.31973e-05	0.000613897	1.38521	0.470103
D-Ribose	0.901185	345.813	149.045	Organic oxygen compounds	1.55619e-05	5.49322e-06	1.75884	0.0202209	0.0591912	2.83292	1.50229
gamma-Glutamylleucine	0.892261	427.272	261.144	Organic acids and derivatives	1.14905e-06	5.18915e-07	1.61789	0.00309946	0.0153562	2.21433	1.14687
2-Oxovaleric acid	0.889733	62.0219	115.039	Organic acids and derivatives	0.00464084	0.0063461	1.81734	5.18304e-06	8.64102e-05	0.731291	-0.451483
3-Hydroxyisovalerylcarnitine	0.884433	321.847	262.165	Lipids and lipid-like molecules	1.88287e-05	9.68763e-06	1.85461	1.49729e-05	0.000208116	1.94358	0.958714
N6-Acetyl-L-lysine	0.882508	363.448	189.124	Organic acids and derivatives	6.28396e-06	4.87294e-06	1.06746	0.0186611	0.0559439	1.28956	0.366882
Pantothenic acid	0.881907	277.313	220.108	Organooxygen compounds	1.78368e-05	2.91083e-05	1.74038	0.00021345	0.00196568	0.612775	-0.706571
24-Epibrassinolide	0.880639	104.908	479.339	Lipids and lipid-like molecules	3.21496e-07	3.22672e-06	2.63171	1.15599e-09	9.56961e-08	0.0996354	-3.3272
1-Methylhistidine	0.878883	441.449	170.093	Organic acids and derivatives	6.5992e-05	3.13275e-05	1.69875	0.000375933	0.00309238	2.10652	1.07486
Deoxyribose 5-phosphate	0.871169	177.103	213.017	Organic oxygen compounds	0.000887483	0.000690504	1.65953	0.00188366	0.0105303	1.28527	0.362068
Polyoxyethylene (600) monoricinoleate	0.865583	215.574	341.305	Lipids and lipid-like molecules	1.9713e-05	1.38942e-05	1.38204	0.0366463	0.0895605	1.4188	0.50467
4,8 Dimethylnonanoyl carnitine	0.864065	207.196	330.264	Lipids and lipid-like molecules	5.20146e-06	1.60841e-05	1.7472	5.42706e-08	2.0953e-06	0.323391	-1.62865
Methylgingerol	0.86254	204.745	307.192	Benzenoids	1.48707e-06	3.03892e-06	1.42715	0.00563177	0.0236841	0.48934	-1.03109
(-)-Salsoline	0.859665	38.7831	194.115	Organoheterocyclic compounds	8.50982e-06	2.17941e-05	1.31833	0.000112185	0.00116192	0.390465	-1.35673
Leucyl-Valine	0.854433	212.574	231.171	Organic acids and derivatives	9.65544e-06	1.63519e-05	1.2998	0.00241645	0.0127737	0.590479	-0.760043
4-Acetylbutyrate	0.853764	55.0671	129.055	Lipids and lipid-like molecules	0.0123214	0.021101	2.25394	3.70744e-08	1.56993e-06	0.583924	-0.776148
Valeric acid	0.851987	54.9085	101.06	Lipids and lipid-like molecules	9.31868e-05	0.000149047	2.08904	1.35127e-06	3.01672e-05	0.625218	-0.677569
Androsterone sulfate	0.85082	27.9018	369.174	Lipids and lipid-like molecules	0.000478285	0.00430198	2.31537	8.0549e-05	0.000877471	0.111178	-3.16906
D-Xylitol	0.850648	247.203	151.061	Organic oxygen compounds	2.72506e-05	1.41293e-05	1.73051	0.00141963	0.00848515	1.92866	0.9476
13-L-Hydroperoxylinoleic acid	0.843112	67.6021	311.223	Lipids and lipid-like molecules	2.38034e-06	7.81779e-06	1.89625	0.0122685	0.0414589	0.304477	-1.7156
4-Aminobutyraldehyde	0.840868	281.582	88.0875	Organic oxygen compounds	5.48766e-06	3.4319e-06	1.54692	0.000235741	0.00213038	1.59901	0.677183
Methylpyrazine	0.83691	317.299	95.0609	Organoheterocyclic compounds	1.2174e-05	4.78455e-06	1.06037	0.047163	0.105665	2.54443	1.34734
5-Imino-2-methyl-1-cyclopenten-1-ol	0.833738	51.0306	112.076	Organic nitrogen compounds	2.46904e-05	3.30955e-05	1.40599	0.0339137	0.0850753	0.746036	-0.422683
N-a-Acetyl-L-arginine	0.828645	384.766	217.13	Organic acids and derivatives	3.35477e-05	1.74186e-05	1.32361	0.00192739	0.0107224	1.92597	0.945585
Hexylresorcinol	0.822735	49.6757	193.123	Benzenoids	1.09245e-05	4.70394e-05	2.37526	0.00108176	0.00691917	0.232241	-2.10631
alpha-Methylstyrene	0.821898	31.7484	119.086	Benzenoids	3.16771e-05	2.13457e-05	1.84228	2.92144e-05	0.00036519	1.484	0.569493
Phenylalanylproline	0.821848	287.413	261.124	Organic acids and derivatives	3.46757e-07	4.99294e-07	1.51416	0.0200624	0.0588678	0.694495	-0.525964
(2R,3R,4R)-2-Amino-4-hydroxy-3-methylpentanoic acid	0.820632	313.747	148.097	Organic acids and derivatives	5.80437e-05	3.4702e-05	2.01273	5.0908e-05	0.000590852	1.67263	0.74212
2-Methoxyestrone 3-glucuronide	0.819482	306.626	477.214	Lipids and lipid-like molecules	2.42467e-06	4.86631e-06	1.40626	0.0032325	0.0158227	0.498256	-1.00504
1-(5Z,8Z,11Z,14Z-eicosatetraenoyl)-sn-glycero-3-phosphate	0.819141	266.594	459.252	Lipids and lipid-like molecules	6.54533e-07	2.37323e-06	1.377	0.0127751	0.0427005	0.275799	-1.85831
PE(22:4(7Z,10Z,13Z,16Z)/14:0)	0.818119	161.725	740.521	Lipids and lipid-like molecules	3.31886e-05	1.24941e-05	1.45923	0.000404882	0.0032769	2.65634	1.40944
5-Hydroxy-L-tryptophan	0.81608	48.4027	221.092	Organoheterocyclic compounds	1.46703e-05	2.45759e-05	1.91894	9.63364e-05	0.00102142	0.596938	-0.744348
N-Cyclopropyl-trans-2-cis-6-nonadienamide	0.814712	50.4077	194.154	Lipids and lipid-like molecules	3.23794e-05	4.49047e-05	1.94246	0.000118776	0.00121844	0.721069	-0.471791
Butyrylcarnitine	0.808066	276.971	232.154	Lipids and lipid-like molecules	0.000420885	0.000170487	1.44642	0.00938291	0.034271	2.46872	1.30376
L-Asparagine	0.801981	392.664	131.045	Organic acids and derivatives	1.05839e-05	7.85948e-06	1.11929	0.00908704	0.0335151	1.34664	0.429363
3-Hydroxycapric acid	0.799418	60.1994	187.133	Organic acids and derivatives	2.98886e-05	4.92385e-05	1.63311	0.00544192	0.0231201	0.607017	-0.720192
Lactosylceramide (d18:1/16:0)	0.795683	204.662	862.622	Lipids and lipid-like molecules	5.04178e-06	7.94393e-06	1.05404	0.00512928	0.0221657	0.634671	-0.655919
Imidazole-4-acetaldehyde	0.794654	271.313	111.056	Organoheterocyclic compounds	0.000226966	0.000301935	2.25579	7.91144e-06	0.000122385	0.751705	-0.411761
D-Mannose	0.790563	289.033	179.056	Organic oxygen compounds	2.86328e-05	1.71387e-05	2.18412	4.81295e-06	8.1244e-05	1.67065	0.740413
3-(3,4-Dihydroxy-5-methoxy)-2-propenoic acid	0.785747	192.308	209.045	Phenylpropanoids and polyketides	3.1818e-06	5.63755e-06	1.225	0.00890741	0.0330502	0.564394	-0.825225
Aldehydo-D-xylose	0.784292	92.6622	149.045	Organic oxygen compounds	0.000144121	9.49077e-05	1.51089	0.00580054	0.024176	1.51854	0.602688
p-Mentha-1,3,8-triene	0.783333	72.1493	135.117	Lipids and lipid-like molecules	1.75058e-05	2.40716e-05	1.4214	0.00191658	0.0106746	0.727239	-0.459499
alpha-Hydroxytamoxifen	0.778475	427.887	388.23	Phenylpropanoids and polyketides	2.60283e-06	1.4763e-06	1.48867	0.000870357	0.00589019	1.76308	0.818099
Calystegin A3	0.776466	84.9835	160.097	Alkaloids and derivatives	1.14315e-05	4.5059e-06	1.05889	0.000993477	0.00650273	2.53701	1.34313
cis-5-Tetradecenoylcarnitine	0.772126	201.919	370.295	Lipids and lipid-like molecules	4.61807e-05	0.000114157	1.64824	0.00939012	0.0342892	0.404537	-1.30566
N-Methylnicotinamide	0.772057	45.7805	137.071	Organoheterocyclic compounds	0.0002816	0.000516807	1.58843	0.00495374	0.0216153	0.544884	-0.875979
Ethylbenzene	0.771537	32.4378	107.086	Benzenoids	2.55603e-05	1.74321e-05	1.64332	2.37187e-05	0.000306694	1.46628	0.55216
PC(22:5(4Z,7Z,10Z,13Z,16Z)/18:0)	0.768114	57.2051	836.614	Lipids and lipid-like molecules	0.000182856	0.00011196	1.22596	0.00961459	0.0348527	1.63322	0.707723
(3R, 6'Z)-3,4-Dihydro-8-hydroxy-3-(6-pentadecenyl)-1H-2-benzopyran-1-one	0.765881	238.44	373.274	Organoheterocyclic compounds	6.41108e-06	2.66916e-07	1.27811	0.00537307	0.0229127	24.0191	4.58611
Perillic acid	0.765599	61.9374	165.091	Lipids and lipid-like molecules	8.50284e-05	0.000311133	2.27229	0.000196484	0.00184278	0.273286	-1.87151
Hexacosanoyl carnitine	0.754601	183.435	540.5	Lipids and lipid-like molecules	1.52585e-05	9.124e-06	1.89635	0.00347151	0.0166578	1.67235	0.741874
2,5-Dimethyl-1H-pyrrole	0.749535	69.6511	96.0812	Organoheterocyclic compounds	6.65103e-05	8.30848e-05	1.39672	0.00243854	0.0128616	0.800511	-0.321006
Linoleyl carnitine	0.745972	196.506	424.342	Lipids and lipid-like molecules	4.79417e-05	6.07336e-05	1.03397	0.0306802	0.0794573	0.789376	-0.341215
PC(18:1(11Z)/14:0)	0.742644	37.9112	732.553		0.000184239	0.00011349	1.49838	0.00998318	0.0357604	1.62339	0.699006
Estrone glucuronide	0.742324	48.0385	445.19	Lipids and lipid-like molecules	1.09457e-06	3.9544e-06	1.90039	0.00368486	0.0174027	0.276799	-1.85309
6,10,14-Trimethyl-5,9,13-pentadecatrien-2-one	0.739372	105.407	263.237	Lipids and lipid-like molecules	1.04958e-05	2.19759e-05	2.02069	9.30665e-05	0.000991605	0.477603	-1.06611
N-Alpha-acetyllysine	0.733824	403.64	189.124	Organic acids and derivatives	3.92193e-06	2.03778e-06	1.765	0.000480791	0.00373364	1.92461	0.944564
1-Phenyl-1,3-docosanedione	0.721867	107.314	415.357	Organic oxygen compounds	7.2293e-07	1.17376e-05	2.71205	3.2205e-07	9.2963e-06	0.061591	-4.02114
Phenylalanyl-Tryptophan	0.720057	193.712	352.165	Organic acids and derivatives	5.7524e-06	1.02914e-05	2.09613	9.71018e-07	2.31674e-05	0.558953	-0.839201
N-Acetylserine	0.713789	310.27	146.045	Organic acids and derivatives	8.75247e-05	4.61506e-05	1.81597	0.00216184	0.0117319	1.8965	0.92334
PC(22:4(7Z,10Z,13Z,16Z)/16:0)	0.709613	155.391	810.599	Lipids and lipid-like molecules	0.00493655	0.00421766	1.30494	0.0466597	0.10489	1.17045	0.227061
(Â±)-2-(2-Furanyl)pyrrolidine	0.709552	49.072	138.091	Organic nitrogen compounds	3.34223e-05	4.93304e-05	1.60088	0.00204604	0.0112395	0.677518	-0.561668
2-Methyl-3-oxopropanoic acid	0.708484	367.962	103.039	Organic oxygen compounds	4.2356e-05	3.78664e-05	1.06544	0.0357023	0.0880375	1.11856	0.161648
2-Methylglutaric acid	0.708119	82.2539	145.05	Lipids and lipid-like molecules	8.5019e-06	5.86435e-06	1.76431	0.000169443	0.00163724	1.44976	0.535814
Hydroxyprolyl-Serine	0.705163	182.209	219.098	Organic acids and derivatives	2.38682e-06	1.35808e-07	1.04803	0.0447707	0.101937	17.575	4.13545
cis-Aconitic acid	0.704372	446.417	173.008	Organic acids and derivatives	7.46084e-06	9.3569e-06	1.74833	0.00875687	0.0326593	0.797362	-0.326693
Epidermin	0.703992	412.334	262.129	Organic oxygen compounds	2.15772e-05	1.32323e-05	1.17106	0.00749555	0.0292185	1.63065	0.705447
3,4-Dihydro-6-hydroxy-2,5,7,8-tetramethyl-2H-1-benzopyran-2-carboxylic acid	0.698498	93.0604	249.113	Organoheterocyclic compounds	7.45988e-07	2.55752e-06	1.69671	0.0437684	0.100407	0.291684	-1.77752
1-(1-Pyrrolidinyl)-2-butanone	0.696532	32.6579	142.123	Organoheterocyclic compounds	2.44936e-05	1.57926e-05	1.6383	3.34145e-05	0.000407806	1.55095	0.633153
5-Butyl-2-ethyloxazole	0.694263	41.0616	154.123	Organoheterocyclic compounds	0.00216118	0.00303115	1.36238	0.012483	0.0419879	0.71299	-0.488047
PC(18:3(6Z,9Z,12Z)/18:0)	0.680088	59.7445	784.585		0.00205576	0.00145403	1.5942	0.00619465	0.0253281	1.41384	0.499618
6-Hydroxy-1H-indole-3-acetamide	0.667785	45.7906	191.082	Organoheterocyclic compounds	1.61007e-05	2.64005e-05	1.5668	0.00182012	0.0102653	0.609865	-0.713437
Glutaminyllysine	0.662342	472.801	275.171	Organic acids and derivatives	8.2507e-07	3.727e-07	1.56252	0.00138353	0.00832123	2.21377	1.1465
2-Methyl-1,3-cyclohexadiene	0.66083	68.1458	95.086	Hydrocarbons	0.000236663	0.000295161	1.28847	0.0086071	0.0322664	0.801811	-0.318666
LysoPC(P-16:0)	0.659737	208.044	480.344	Lipids and lipid-like molecules	0.000213768	0.000295572	1.66081	0.000751315	0.00527828	0.723232	-0.467469
Acetylcholine	0.658665	353.443	182.093	Organic nitrogen compounds	1.40808e-05	2.85002e-05	1.41924	0.0334287	0.0842543	0.494059	-1.01725
PC(18:2(9Z,12Z)/18:0)	0.657008	119.298	786.601	Lipids and lipid-like molecules	0.000534564	0.000279639	1.88734	0.00198959	0.0109951	1.91162	0.934796
1-deoxy-1-(N6-lysino)-D-fructose	0.655802	324.624	132.029	Organic acids and derivatives	1.41685e-05	4.90897e-06	1.74024	0.0260042	0.0707514	2.88624	1.52919
(R)-3-Hydroxy-tetradecanoic acid	0.655481	60.6577	243.196	Lipids and lipid-like molecules	3.58553e-06	9.45504e-06	1.89016	0.0265452	0.0717672	0.379219	-1.3989
Guanosine	0.65151	278.593	284.099	Nucleosides, nucleotides, and analogues	3.78571e-06	8.70881e-06	1.49422	0.0105341	0.0370775	0.434699	-1.20191
PC(18:3(6Z,9Z,12Z)/18:1(11Z))	0.650589	59.1914	782.57		0.00374072	0.00223355	1.90034	0.00100427	0.00655466	1.67479	0.743982
Isopalmitic acid	0.650486	42.9698	255.233	Lipids and lipid-like molecules	0.00556911	0.00812163	1.02456	0.0239284	0.0667306	0.685713	-0.544324
Squamolone	0.649003	75.7734	129.066	Organoheterocyclic compounds	1.75911e-05	2.21535e-05	1.48242	0.0140378	0.04568	0.794056	-0.332688
(3beta,5alpha,6beta,7alpha,22E,24R)-Ergosta-8,22-diene-3,5,6,7-tetrol	0.64866	104.881	447.347	Lipids and lipid-like molecules	6.82692e-07	4.91983e-06	2.24433	4.2302e-07	1.15943e-05	0.138763	-2.8493
PC(18:4(6Z,9Z,12Z,15Z)/18:1(11Z))	0.648452	158.821	780.554	Lipids and lipid-like molecules	0.000292063	0.000165705	1.07362	0.0129111	0.0430291	1.76255	0.817661
PE(16:0/18:2(9Z,12Z))	0.64665	166.61	714.51	Lipids and lipid-like molecules	7.76059e-05	3.41132e-05	2.51077	2.28346e-06	4.45629e-05	2.27495	1.18584
PC(20:5(5Z,8Z,11Z,14Z,17Z)/P-18:1(11Z))	0.646055	151.863	790.573	Lipids and lipid-like molecules	0.000173641	0.000117229	1.5047	0.01338	0.0441478	1.48122	0.566784
Linamarin	0.639083	402.402	248.113	Organic oxygen compounds	6.95589e-06	3.7823e-06	1.07513	0.0331079	0.083707	1.83906	0.878972
3,4-Dimethyl-5-pentyl-2-furanheptanoic acid	0.637124	104.655	295.227	Lipids and lipid-like molecules	1.46105e-06	8.98931e-06	2.68815	5.7182e-06	9.3659e-05	0.162532	-2.62121
gamma-Calacorene	0.634431	31.0485	201.164	Lipids and lipid-like molecules	5.65495e-06	3.69991e-06	1.56765	0.00280761	0.014292	1.5284	0.612024
PC(22:5(7Z,10Z,13Z,16Z,19Z)/16:1(9Z))	0.629217	156.369	806.569	Lipids and lipid-like molecules	0.0028808	0.00208506	1.46869	0.00907776	0.0334912	1.38164	0.466377
PC(20:2(11Z,14Z)/20:4(5Z,8Z,11Z,14Z))	0.629149	154.088	834.599	Lipids and lipid-like molecules	0.00151462	0.00100009	1.40895	0.0082277	0.0312527	1.51448	0.598821
PC(22:5(7Z,10Z,13Z,16Z,19Z)/20:1(11Z))	0.626858	152.11	862.629	Lipids and lipid-like molecules	1.20191e-05	8.48433e-06	1.06658	0.0164191	0.0510459	1.41663	0.502461
Guanidinosuccinic acid	0.625807	415.253	176.067	Organic acids and derivatives	2.99042e-05	7.41864e-06	1.73872	0.00367595	0.017372	4.03096	2.01112
PC(22:5(7Z,10Z,13Z,16Z,19Z)/16:0)	0.623528	156.369	808.583	Lipids and lipid-like molecules	0.0016694	0.00127082	1.849	0.00114466	0.00722386	1.31364	0.393571
Dibutyl phthalate	0.620059	74.2012	277.145	Benzenoids	7.57785e-05	0.000108935	1.44828	0.0030011	0.015004	0.695632	-0.523603
10-Hydroxycarbazepine	0.617857	32.6964	255.113	Organoheterocyclic compounds	1.40576e-05	2.32586e-05	1.0262	0.0124385	0.0418786	0.604405	-0.726413
13-Heptadecyn-1-ol	0.617112	105.124	253.253	Lipids and lipid-like molecules	7.69198e-07	1.22287e-05	2.76104	2.07218e-07	6.37242e-06	0.0629011	-3.99077
N-Carbamoyl-2-amino-2-(4-hydroxyphenyl)acetic acid	0.613142	300.936	211.071	Organic acids and derivatives	1.45466e-06	2.41468e-06	1.79594	0.000427638	0.00341782	0.602423	-0.731152
Formiminoglutamic acid	0.61259	227.773	175.071	Organic acids and derivatives	3.72183e-05	7.60179e-06	2.07255	0.0431949	0.0995729	4.89599	2.2916
PC(22:6(4Z,7Z,10Z,13Z,16Z,19Z)/20:1(11Z))	0.61031	151.904	860.614	Lipids and lipid-like molecules	1.13146e-05	5.12805e-06	2.35489	5.67813e-08	2.16434e-06	2.20642	1.14171
Norambreinolide	0.609794	106.028	251.2	Organoheterocyclic compounds	5.17815e-06	3.78874e-05	2.71765	1.12237e-09	9.37583e-08	0.136672	-2.87121
DG(18:4(6Z,9Z,12Z,15Z)/15:0/0:0)	0.594868	104.599	575.468	Lipids and lipid-like molecules	2.16681e-06	1.5464e-05	2.18885	3.062e-05	0.00037968	0.140119	-2.83527
L-Fucose	0.592943	208.067	163.06	Organic oxygen compounds	0.000219477	0.000359339	1.40322	0.00379054	0.017763	0.61078	-0.711275
PC(20:4(8Z,11Z,14Z,17Z)/20:3(8Z,11Z,14Z))	0.591197	154.242	832.583	Lipids and lipid-like molecules	0.00012869	8.12849e-05	1.51275	0.00130193	0.00795716	1.5832	0.662839
4-hydroxy-3-[1-(4-hydroxyphenyl)-3-oxobutyl]-2H-chromen-2-one	0.584621	187.714	323.09	Phenylpropanoids and polyketides	2.19334e-06	2.97838e-06	1.36659	0.000919793	0.00613997	0.736421	-0.441398
PC(22:6(4Z,7Z,10Z,13Z,16Z,19Z)/18:1(11Z))	0.584505	37.0353	832.583	Lipids and lipid-like molecules	2.60075e-05	1.87336e-05	1.13438	0.019882	0.058498	1.38828	0.473301
4-Oxo-2-nonenal	0.576941	32.6716	155.107	Organic oxygen compounds	2.07525e-05	1.09702e-05	1.65843	2.4246e-05	0.000312481	1.89171	0.919695
Acetylglycine	0.576743	294.547	116.034	Organic acids and derivatives	3.96087e-05	2.62224e-05	1.6025	0.0126797	0.0424688	1.51049	0.595015
L,L-Cyclo(leucylprolyl)	0.574389	63.2738	211.144	Organic acids and derivatives	0.000139567	0.00019399	1.80157	0.000260676	0.00231454	0.719454	-0.475026
PC(22:5(7Z,10Z,13Z,16Z,19Z)/14:0)	0.57232	59.8359	780.554		0.000150272	6.43557e-05	1.37233	0.00792301	0.0304189	2.33502	1.22343
Chenodeoxyglycocholic acid	0.566241	227.892	450.321	Lipids and lipid-like molecules	4.94601e-06	1.42991e-05	1.27883	0.0150213	0.0479356	0.345897	-1.53159
Cysteine-S-sulfate	0.564258	318.168	199.969	Organic acids and derivatives	5.99719e-06	3.8949e-06	1.6571	0.000424249	0.00339705	1.53975	0.6227
PC(22:6(4Z,7Z,10Z,13Z,16Z,19Z)/20:5(5Z,8Z,11Z,14Z,17Z))	0.56151	301.992	852.559	Lipids and lipid-like molecules	3.47924e-06	1.94534e-06	1.33515	0.0021507	0.0116851	1.7885	0.838749
Diethanolamine	0.556653	320.894	106.087	Organic nitrogen compounds	5.10447e-05	1.77178e-05	1.85414	0.00079174	0.00549019	2.88098	1.52656
1-Deoxy-D-glucitol	0.554705	120.5	167.093	Organic oxygen compounds	9.81118e-06	3.48448e-06	1.21494	0.0141555	0.0459498	2.81568	1.49348
N-acetyl-5-aminosalicylic acid	0.553365	312.925	194.046	Benzenoids	5.89927e-07	1.02476e-07	1.69063	0.000904266	0.00606175	5.75674	2.52525
3-cis-Hydroxy-b,e-Caroten-3'-one	0.550663	30.9196	551.426	Lipids and lipid-like molecules	0.000173667	8.83758e-05	1.98192	8.43577e-05	0.000912668	1.9651	0.974603
6-Deoxodolichosterone	0.525887	104.653	449.363	Lipids and lipid-like molecules	5.00889e-07	6.09111e-06	2.65988	1.22561e-06	2.79213e-05	0.0822329	-3.60414
Dopamine 3-O-sulfate	0.5239	146.616	234.043	Organic acids and derivatives	3.42156e-06	9.91043e-07	1.29657	0.00777464	0.0300064	3.45248	1.78763
PC(18:2(9Z,12Z)/15:0)	0.522808	165.965	744.555	Lipids and lipid-like molecules	0.000145893	0.000110961	1.44683	0.00490439	0.0214586	1.31481	0.394855
Cholic acid	0.519046	238.461	426.322	Lipids and lipid-like molecules	1.05156e-05	6.68251e-07	1.1351	0.00491483	0.0214918	15.7361	3.976
LysoPC(18:3(6Z,9Z,12Z))	0.516369	216.881	518.323	Lipids and lipid-like molecules	0.000166789	0.000194748	1.12879	0.0331948	0.0838556	0.856435	-0.223584
beta-D-Glucopyranosyl anthranilate	0.506162	383.772	300.108	Organic oxygen compounds	3.52632e-07	3.46614e-08	1.08548	0.00828367	0.0314039	10.1736	3.34676
Deoxycytidine	0.498543	300.295	228.098	Nucleosides, nucleotides, and analogues	1.08414e-05	1.7672e-05	1.89163	3.99871e-06	6.95557e-05	0.613479	-0.704914
13S-hydroxyoctadecadienoic acid	0.498168	33.5575	279.232	Lipids and lipid-like molecules	1.57161e-05	2.08135e-05	1.00958	0.0220754	0.062968	0.755092	-0.405276
Cryptoflavin	0.494073	30.9291	569.432	Lipids and lipid-like molecules	4.18039e-05	2.64717e-05	1.37169	0.0381673	0.0919583	1.57919	0.659186
(R)-lipoic acid	0.491673	92.8187	205.035	Organoheterocyclic compounds	4.99519e-06	7.22918e-06	1.34644	0.0175816	0.0536091	0.690975	-0.533294
Decanoylcarnitine	0.48543	214.355	316.248	Lipids and lipid-like molecules	8.49998e-05	0.00029677	2.05074	0.00121925	0.0075762	0.286416	-1.80382
Isocitric acid	0.48375	94.1249	191.019	Organic acids and derivatives	4.79584e-05	7.80056e-05	1.53162	0.00479609	0.0211118	0.614807	-0.701795
4,5-Dihydroorotic acid	0.482353	169.119	157.027	Organic acids and derivatives	5.50808e-05	7.9308e-06	1.67471	0.0315479	0.080996	6.94517	2.79601
Hydroxyprolyl-Histidine	0.47729	342.073	269.125	Organic acids and derivatives	1.96359e-06	5.11038e-06	1.31719	4.3862e-07	1.19287e-05	0.384235	-1.37994
Urocanic acid	0.47634	126.731	137.035	Organoheterocyclic compounds	6.31333e-06	2.35242e-06	1.66154	0.000474099	0.00369486	2.68376	1.42426
4-(Methylthio)-1-butanol	0.468811	347.675	121.069	Organosulfur compounds	3.35428e-06	1.49496e-06	1.47719	0.00175289	0.00997971	2.24373	1.1659
Phenylacetylglycine	0.464925	195.773	192.066	Organic acids and derivatives	3.03967e-06	1.64632e-06	1.25077	0.0315353	0.0809737	1.84634	0.884668
PE(P-18:1(11Z)/18:2(9Z,12Z))	0.448301	157.981	726.542	Lipids and lipid-like molecules	4.36666e-05	6.69005e-05	1.02454	0.0212016	0.0611575	0.65271	-0.615486
gamma-Tocopheryl quinone	0.447253	107.397	433.367	Lipids and lipid-like molecules	1.25703e-06	1.63175e-05	2.59751	1.38107e-07	4.50245e-06	0.0770357	-3.69833
Cis-8,11,14,17-Eicosatetraenoic acid	0.4387	121.261	327.227	Lipids and lipid-like molecules	6.84174e-06	3.14898e-06	1.65147	2.98928e-05	0.000372212	2.17268	1.11948
alpha-Tocopherol succinate	0.425078	22.9145	531.404	Lipids and lipid-like molecules	9.37295e-07	2.2074e-06	1.70855	0.00822555	0.0312469	0.424615	-1.23577
Sinapyl alcohol	0.415682	100.215	209.082	Benzenoids	2.89439e-06	1.05327e-05	1.79301	0.0427436	0.0989108	0.2748	-1.86354
Thymine	0.411606	235.731	127.051	Organoheterocyclic compounds	5.86567e-06	4.00615e-06	1.3167	0.00299305	0.0149748	1.46417	0.55008
Naphthalene epoxide	0.407784	309.33	143.049	Benzenoids	7.17782e-06	9.76907e-06	1.76916	0.000703717	0.00502185	0.73475	-0.444676
PE(P-18:1(11Z)/22:4(7Z,10Z,13Z,16Z))	0.387289	151.696	778.573	Lipids and lipid-like molecules	4.94004e-05	6.88807e-05	1.37244	0.0173159	0.053022	0.717188	-0.479577
O-Phosphothreonine	0.353167	175.578	198.017	Organic acids and derivatives	9.86856e-06	7.11151e-06	1.669	0.00233365	0.0124409	1.38769	0.472684
5-Butyl-4-methyl-2-propyloxazole	0.34999	32.6833	182.154	Organoheterocyclic compounds	9.8329e-06	6.06939e-06	1.35965	0.000263577	0.00233555	1.62008	0.696064
