# Supplementary material for: Serum metabolomics analysis reveals metabolite profile and key biomarkers of idiopathic membranous nephropathy
Source: PeerJ journal article supplement (doi:10.7717/peerj.15167), 2023-04-06

# BIO-ko00340: Histidine metabolism (R01168)

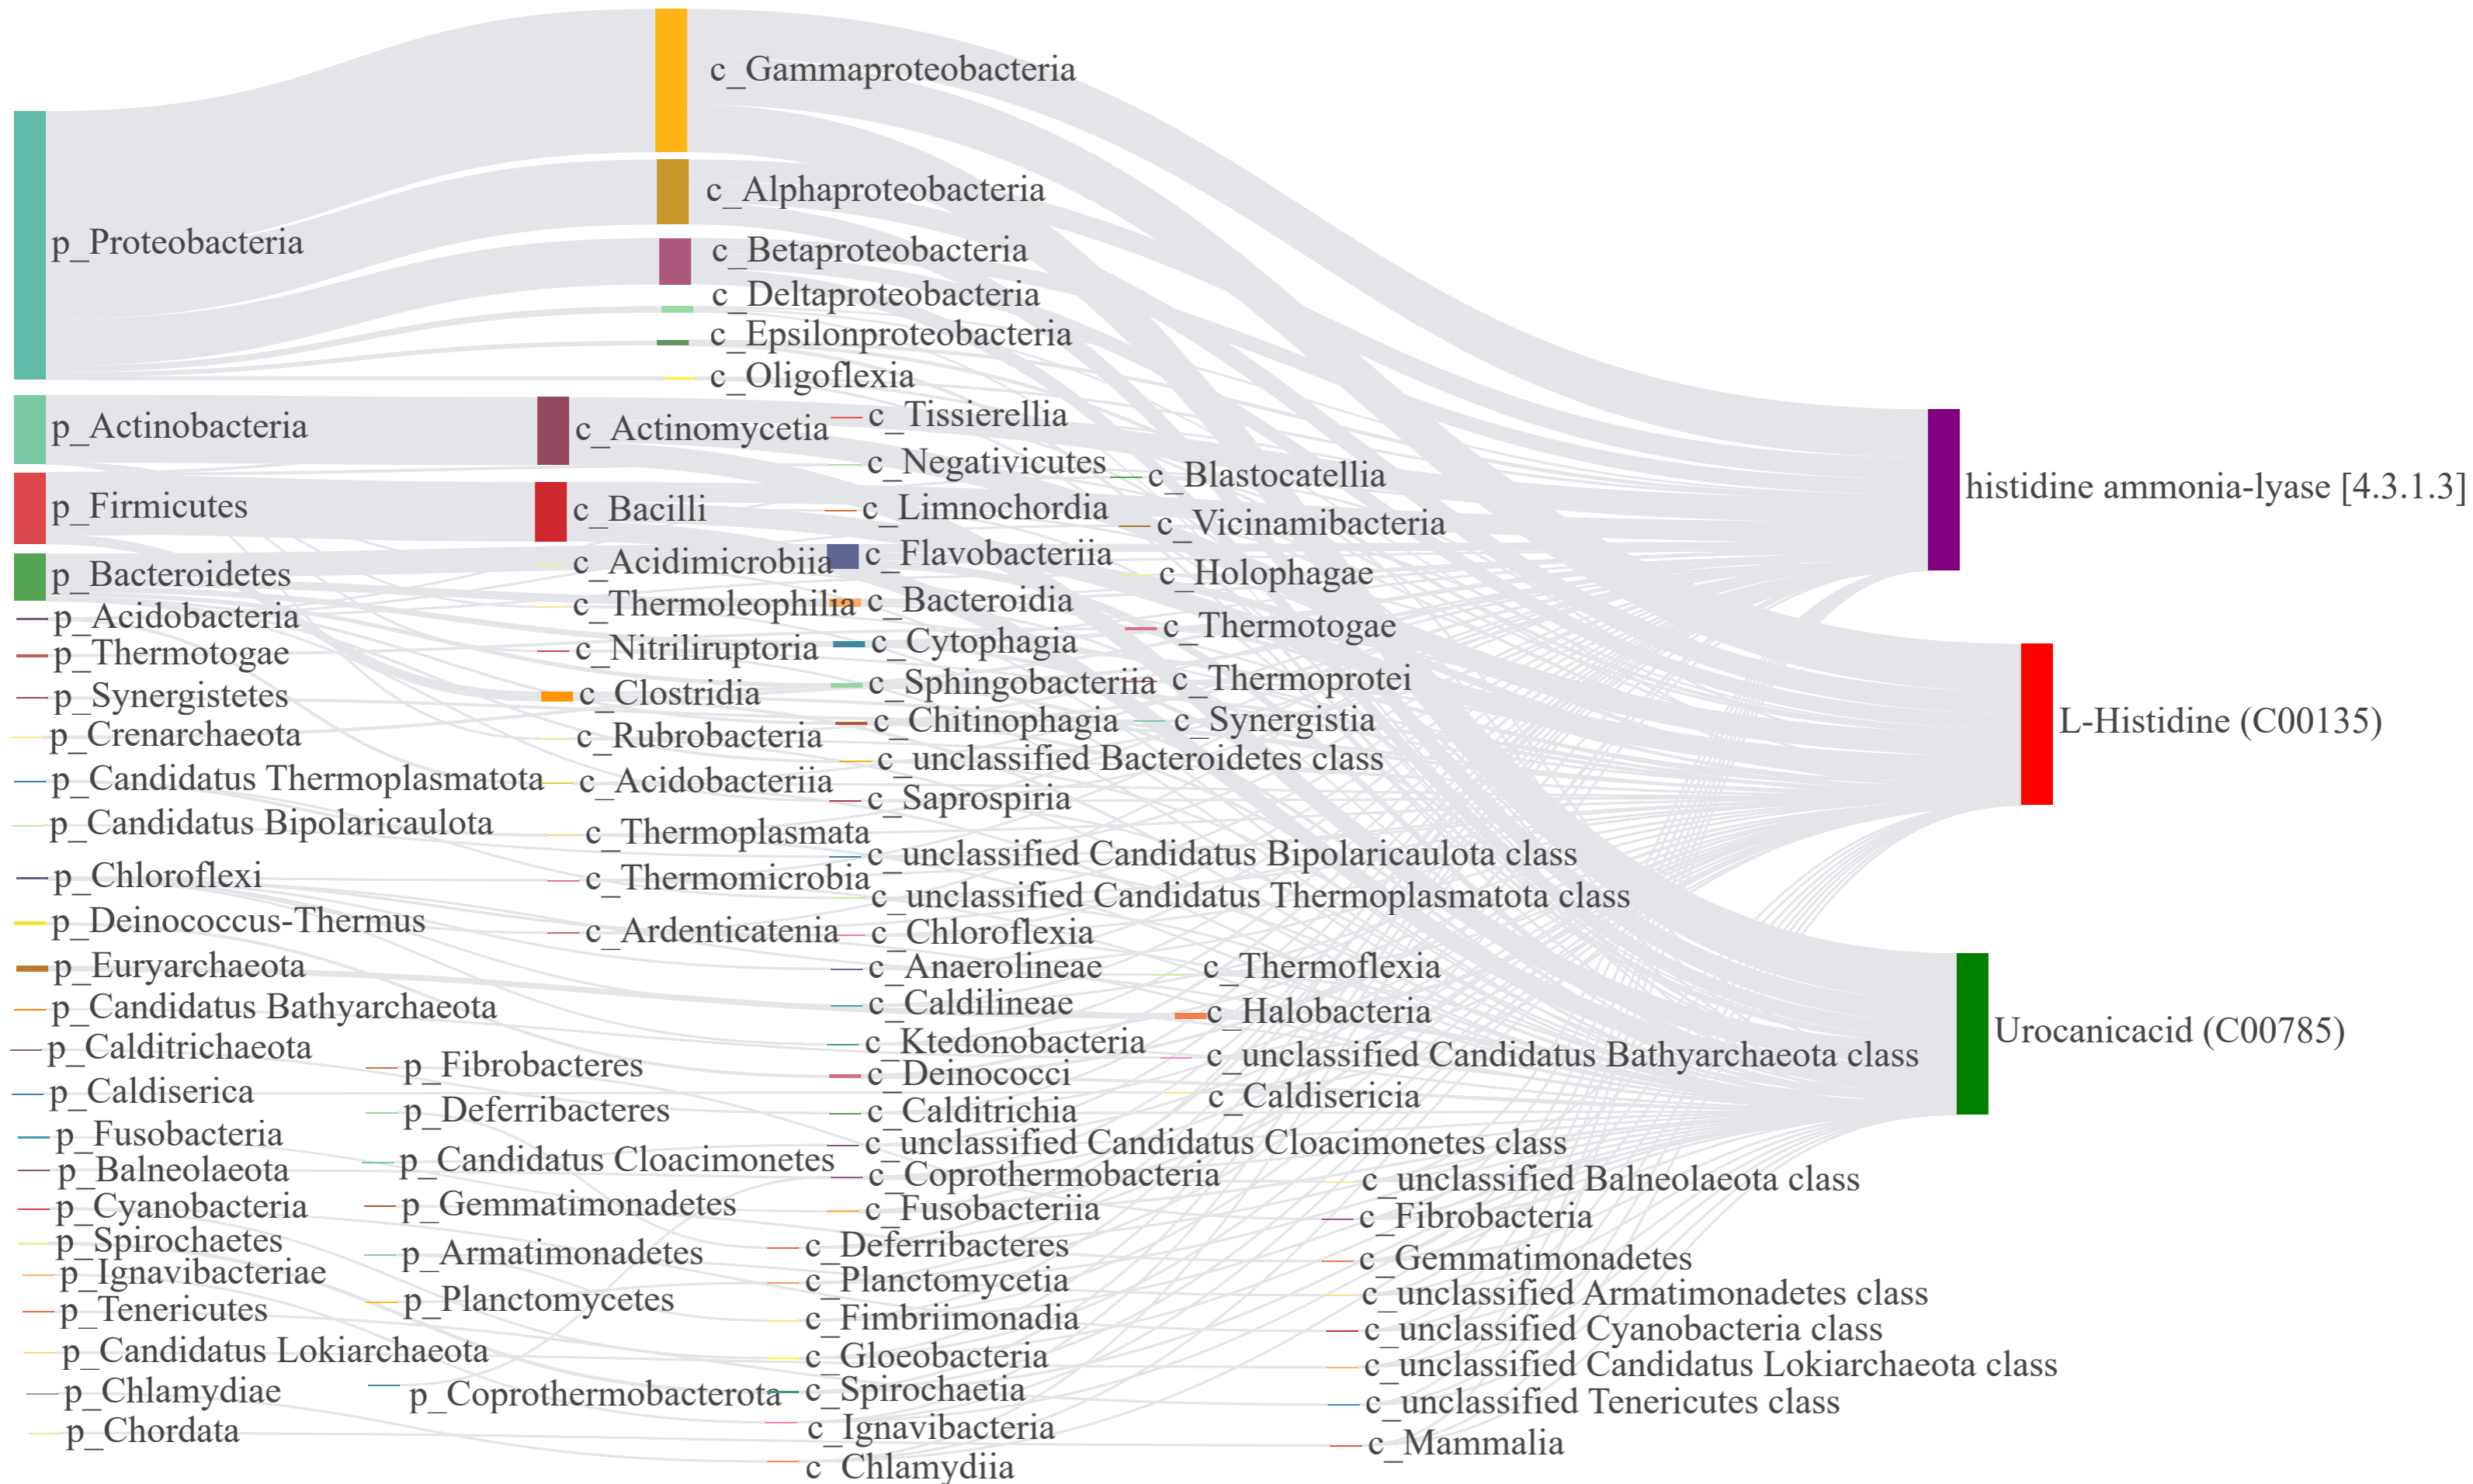

Supplement: Supplemental_Figure_1.pdf [file Supplemental_Figure_1.pdf]
