# Supplementary material for: Serum metabolomics analysis reveals metabolite profile and key biomarkers of idiopathic membranous nephropathy
Source: PeerJ journal article supplement (doi:10.7717/peerj.15167), 2023-04-06

— 1\_QC01 — 1\_QC02 — 1\_QC03 — 1\_QC04 — 1\_QC05  
— 1\_QC06 — 1\_QC07 — 1\_QC08 — 1\_QC09 — 2\_Blank1  
— 2\_Blank2 — 2\_Blank3 — 2\_Blank4

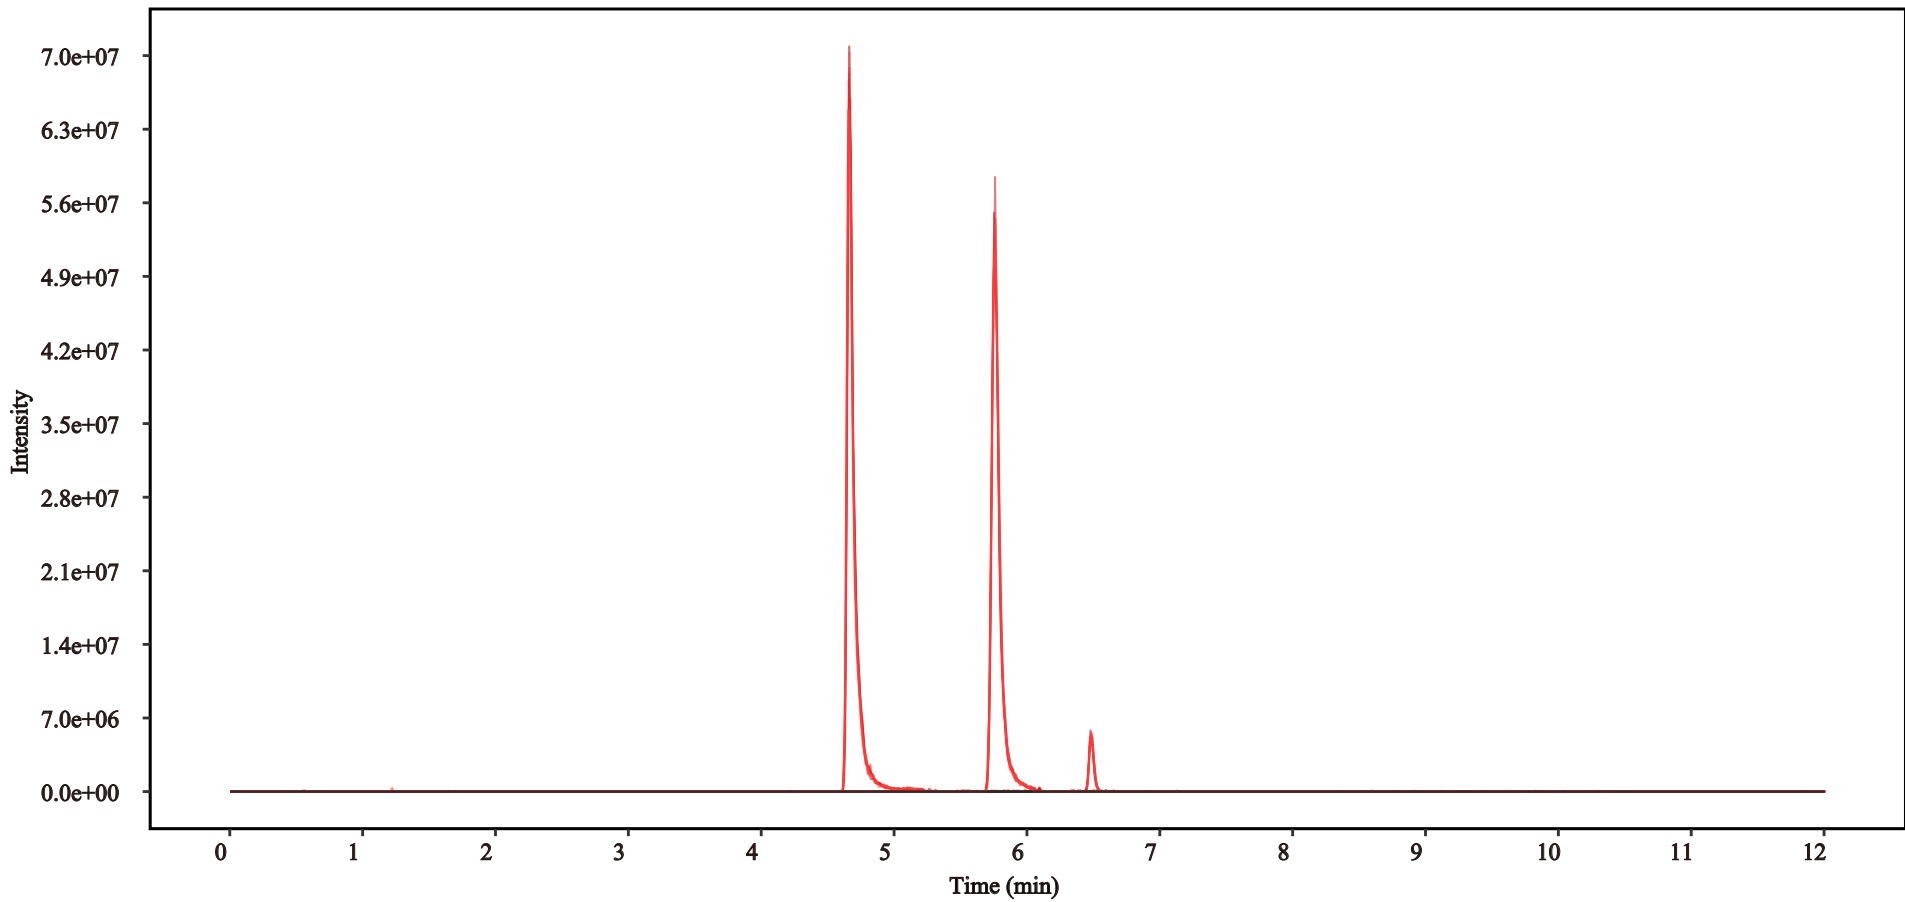

Supplement: Supplemental_Figure_2.pdf [file Supplemental_Figure_2.pdf]
