# Supplementary material for: Serum metabolomics analysis reveals metabolite profile and key biomarkers of idiopathic membranous nephropathy
Source: PeerJ journal article supplement (doi:10.7717/peerj.15167), 2023-04-06

1\_QC01 1\_QC02 1\_QC03 1\_QC04 1\_QC05  
1\_QC06 1\_QC07 1\_QC08 1\_QC09 2\_Blank1  
2\_Blank2 2\_Blank3 2\_Blank4

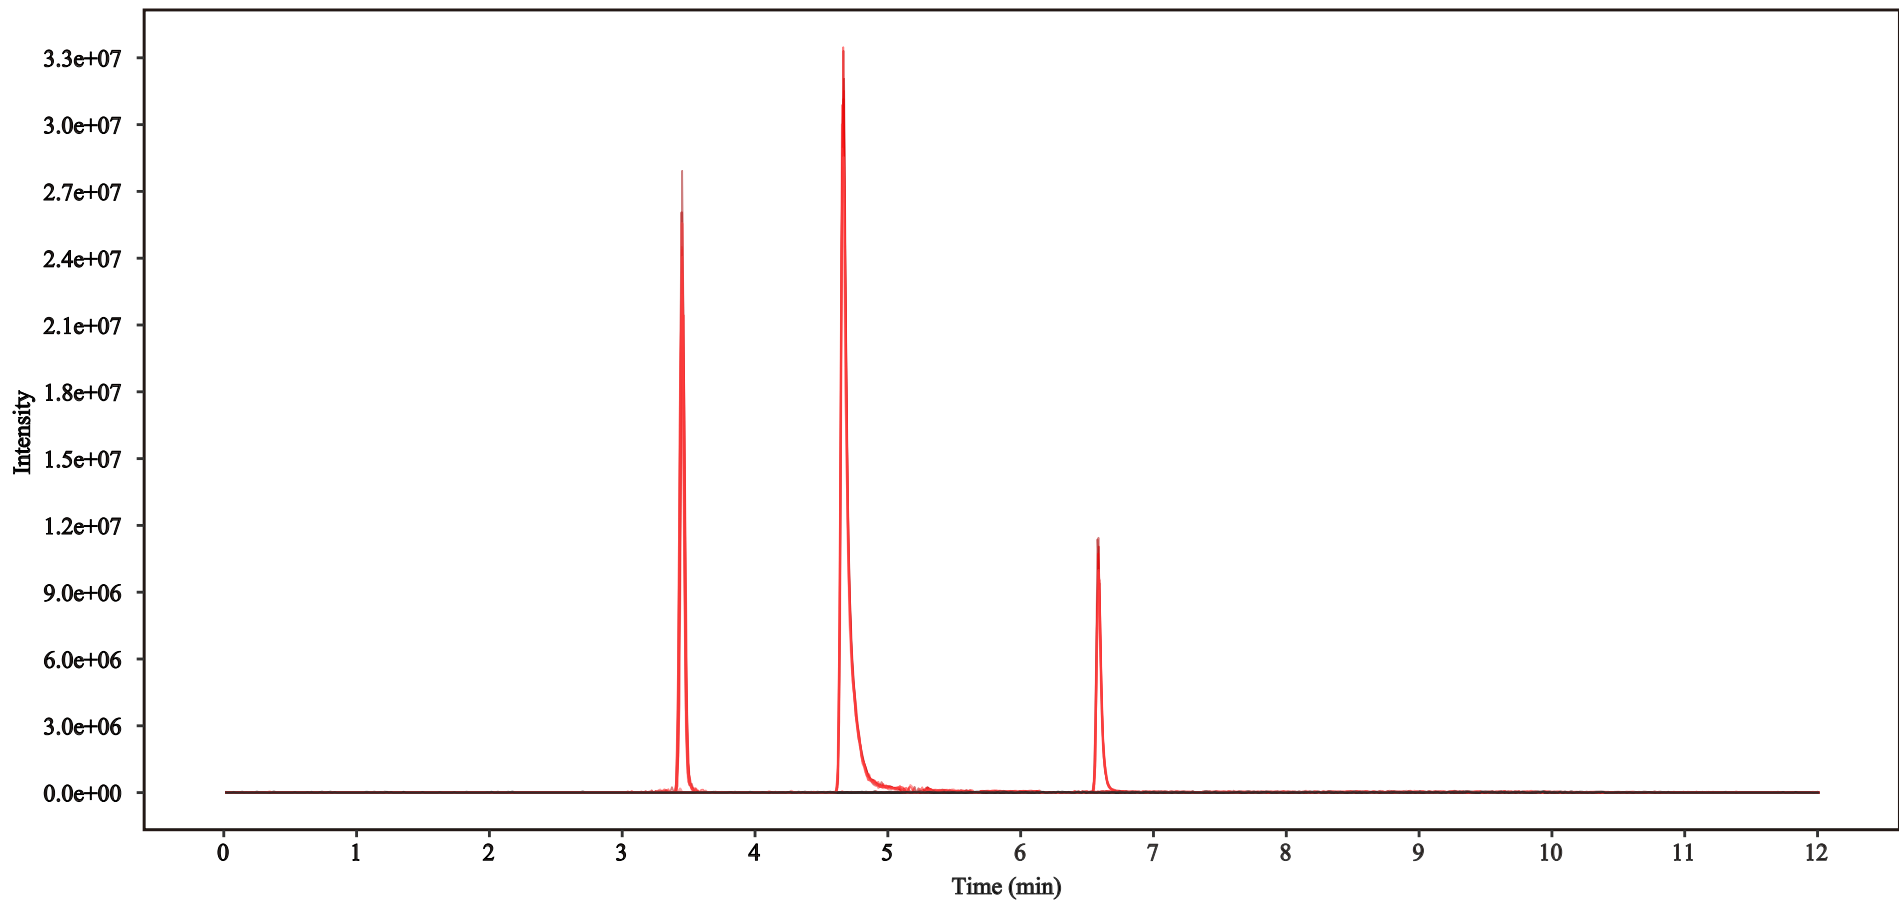

Supplement: Supplemental_Figure_3.pdf [file Supplemental_Figure_3.pdf]
